# Supplementary material for: Exfoliation of MoS2 by zero-valent transition metal intercalation
Source: Royal Society of Chemistry journal article supplement (doi:10.1039/d3cc02528d), 2023-01-01
Supplement: d3cc02528d1.pdf [file d3cc02528d1.pdf]

**Supporting Information of**  
**Exfoliation of MoS<sub>2</sub> by zero-valent transition metal**  
**intercalation**

Duanduan Zhao, Song Xu\*, Hengan Wang, Yonglong Shen, Qun Xu\*

Henan Institute of Advanced Technology, Zhengzhou University, Zhengzhou 450052,  
P.R. China

International College, Zhengzhou University, Zhengzhou 450052, P.R. China

School of Material Science and Engineering, Zhengzhou University, Zhengzhou  
450052, P.R. China.

## Table of Contents

|                                |    |
|--------------------------------|----|
| 1. Experimental sections ..... | S3 |
| 2. Supplementary Figures.....  | S5 |
| 3.Reference.....               | S7 |

## 1. Experimental sections

**Materials.** Commercially available MoS<sub>2</sub> powder and dicobalt octacarbonyl (Co<sub>2</sub>(CO)<sub>8</sub>) were purchased from Macklin (product number M813146) and Aladdin (product number C189362), respectively. Acetonitrile (purchased from Rosen), ethanol and other organic solvents were used as purchased without further purification. Deionized water was used for all aqueous experiments and characterizations.

**Preparation of MoS<sub>2</sub> Nanosheets.** Exfoliation of MoS<sub>2</sub> was achieved with the assistance of zero-valent transition metal complex (Co<sub>2</sub>(CO)<sub>8</sub>) intercalation. Specifically, MoS<sub>2</sub> powder (50 mg, 0.31 mmol) and Co<sub>2</sub>(CO)<sub>8</sub> powder (106.8 mg, 0.31 mmol) were added to dry acetonitrile (5ml) under Ar atmosphere in a Schlenk flask. After the Schlenk flask was sealed and sonicated for 3 h to make a good dispersion, the mixture was stirred overnight at room temperature under Ar to complete the intercalation process. After centrifugation (10000 r/min, 10 min), excess HCl (4 M, 6 mL, 24 mmol) was added to the precipitate and sonicated for 1 h to complete the exfoliation of MoS<sub>2</sub>. Subsequently, the precipitate was collected by centrifugation (10000 r/min, 10 min) and washed by H<sub>2</sub>O twice (10000 r/min, 30 min) to remove excess HCl and other side products. The product collected after the H<sub>2</sub>O wash was proposed to be the exfoliated MoS<sub>2</sub> and used for further experiments.

Ni and Cu intercalation into bulk MoS<sub>2</sub> were accomplished according to literature<sup>1</sup>. Similar to the protocol of Co intercalation assisted exfoliation, the Ni and Cu intercalated MoS<sub>2</sub> were treated with excess HNO<sub>3</sub> and HCl, respectively to separate the MoS<sub>2</sub> layers and produce MoS<sub>2</sub> nanosheets for electrocatalytic HER investigations.

**Characterization.** The morphology of the exfoliated MoS<sub>2</sub> nanosheets was characterized by AFM (Bruker Dimension Icon), TEM (Tecnai G20). Additional chemical and structural characterizations of MoS<sub>2</sub> was accomplished by XRD (Bruker D8 Advance), XPS (KRATOS AXIS Ultra DLD) and Raman spectroscopy (LabRAM Soleil nano).

**Electrochemical Measurements.** All the electrochemical experiments were

implemented in a three-electrode system with an electrochemical station (CHI760E, Shanghai Chenhua Instrument Factory, China). The glassy carbon (GC) electrode (diameter 5 mm) deposited with MoS<sub>2</sub> nanosheets was used as the working electrode. Platinum wire and Ag/AgCl (3 M KCl-filled) electrode were served as counter and reference electrodes, respectively. All measurements were performed in Ar saturated H<sub>2</sub>SO<sub>4</sub> aqueous solution (0.1 M).

The exfoliated MoS<sub>2</sub> nanosheets (catalyst) were deposited onto the GC electrode through the following steps: 5 mg MoS<sub>2</sub> nanosheets was ultrasonicated in 2 mL ethanol containing 0.1 wt% Nafion for 30 mins. Subsequently, 7  $\mu$ L of the homogeneous catalyst ink was then transferred onto the GC electrode, dried under air for linear sweep voltammetry (LSV) characterizations.

## 2. Supplementary Figures

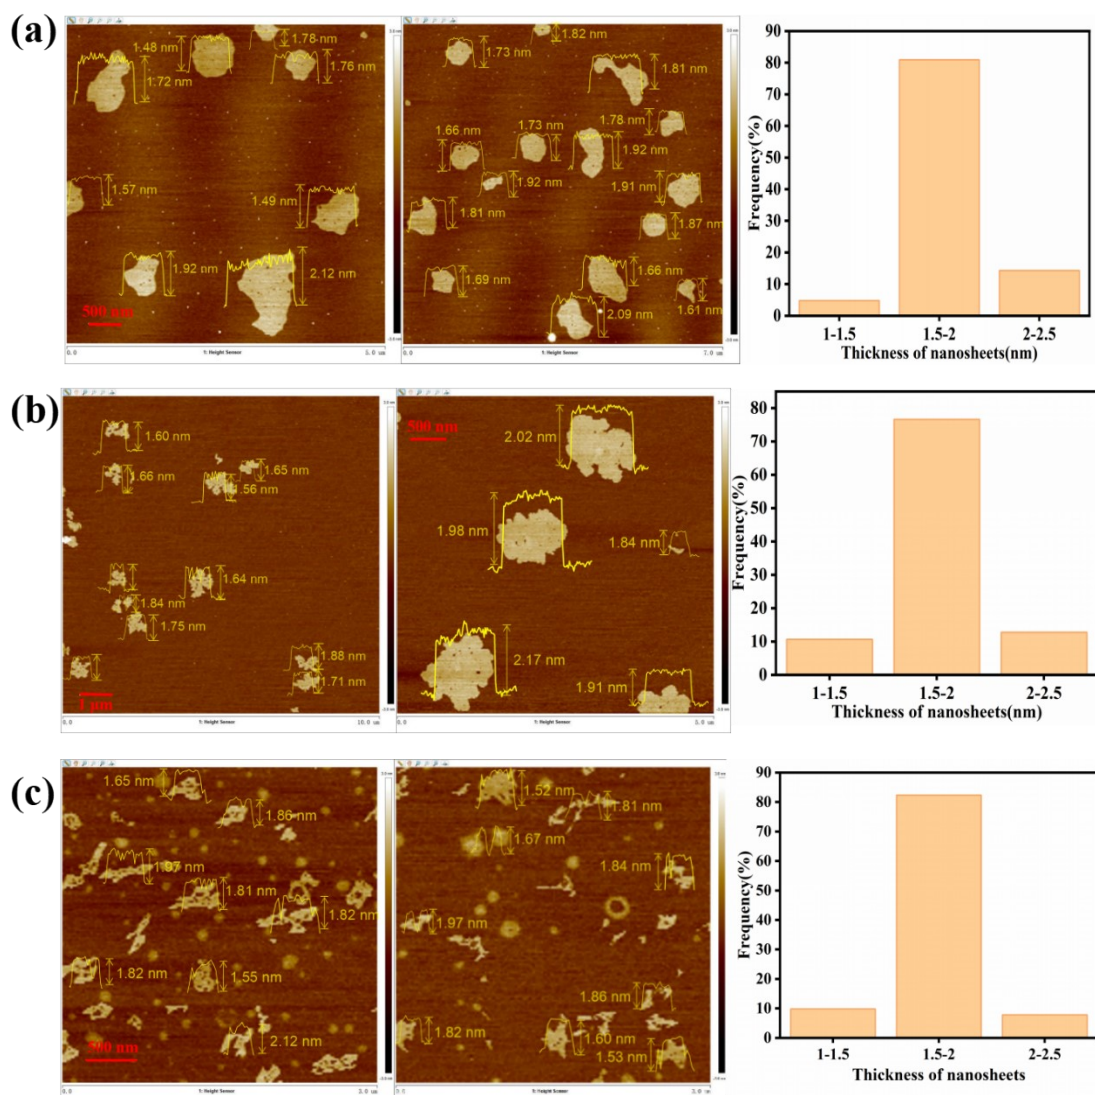

**Figure S1.** (a) The AFM of Co assisted exfoliated MoS<sub>2</sub> nanosheets. (b) The AFM of Cu assisted exfoliated MoS<sub>2</sub> nanosheets. (c) The AFM of Ni assisted exfoliated MoS<sub>2</sub> nanosheets. To make the statistic Figure on the right side, 84, 47 and 53 counts of Co, Cu, Ni assisted exfoliated MoS<sub>2</sub> nanosheets were analyzed and summarized, respectively.

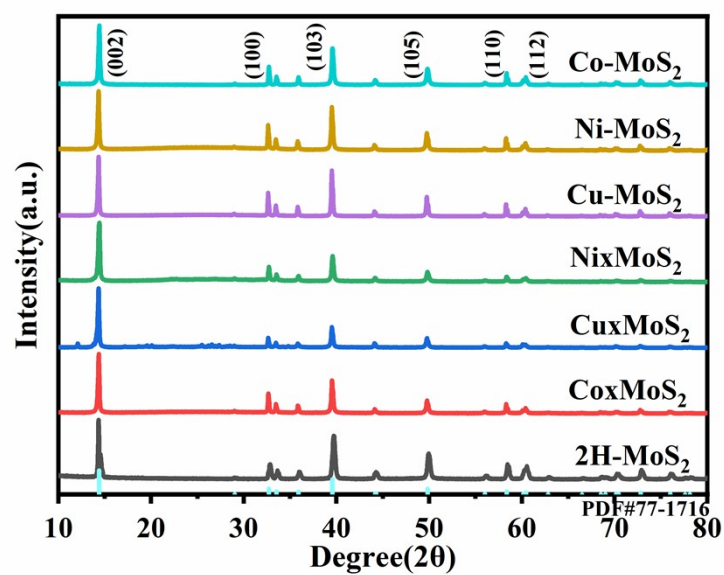

**Figure S2.** XRD characterizations of pristine 2H-MoS<sub>2</sub>, intercalated Co<sub>x</sub>MoS<sub>2</sub>, Cu<sub>x</sub>MoS<sub>2</sub> and Ni<sub>x</sub>MoS<sub>2</sub>, and Co, Cu, Ni assisted exfoliated MoS<sub>2</sub> nanosheets. Crystallographic data for MoS<sub>2</sub> reference is directly retrieved from the database of JADE.

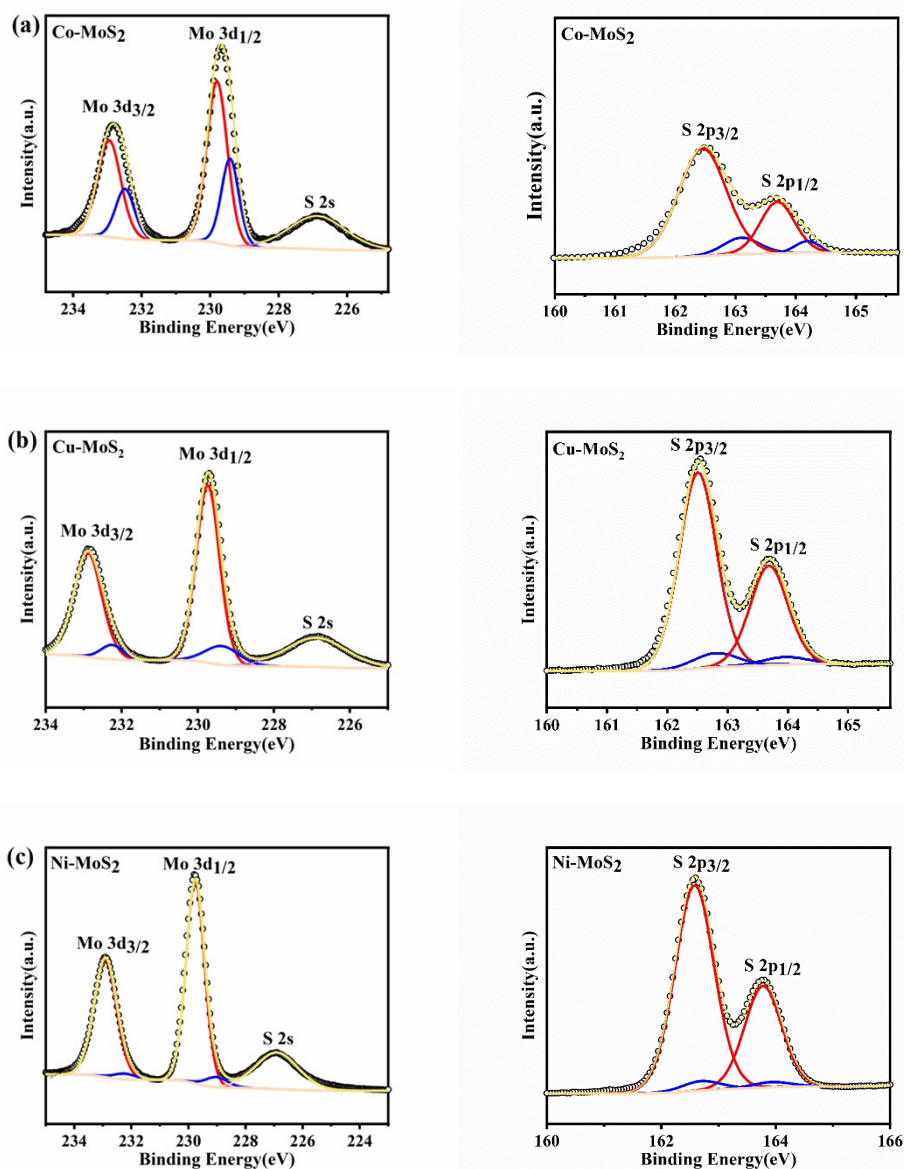

**Figure S3.** (a) The XPS of Mo 3d and S 2p of Co assisted exfoliated MoS<sub>2</sub> nanosheets. (b) The XPS of Mo 3d and S 2p of Cu assisted exfoliated MoS<sub>2</sub> nanosheets. (c) The XPS of Ni 3d and S 2p of Co assisted exfoliated MoS<sub>2</sub> nanosheets.

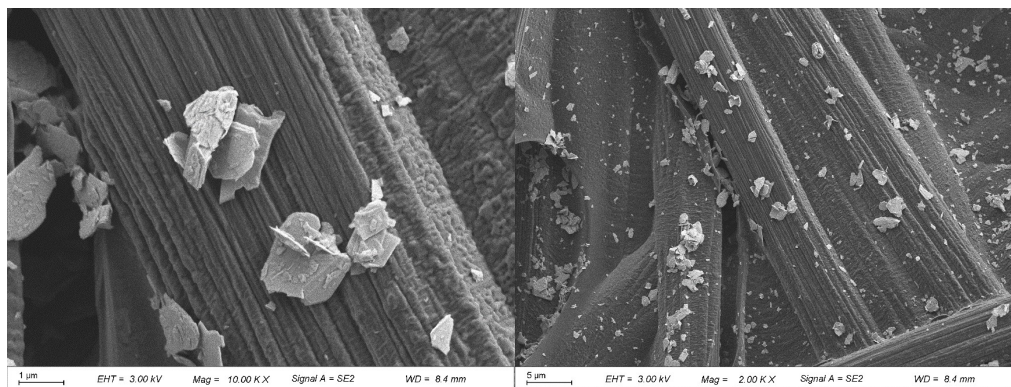

**Figure S4.** The SEM images of Co intercalation assisted exfoliated MoS<sub>2</sub> nanosheets (e-MoS<sub>2</sub>).

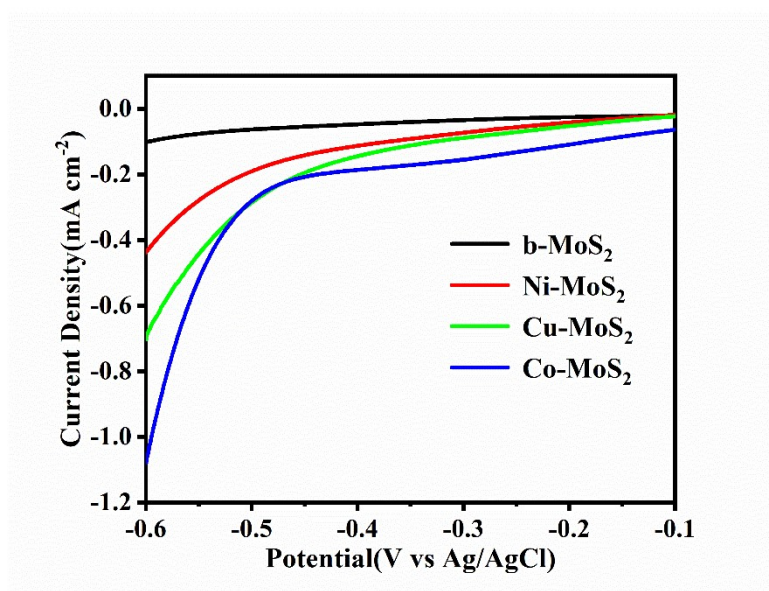

**Figure S5.** Linear sweep voltammetry (LSV) characterizations of pristine and exfoliated MoS<sub>2</sub> exfoliated by the intercalation of Co, Ni, Cu.

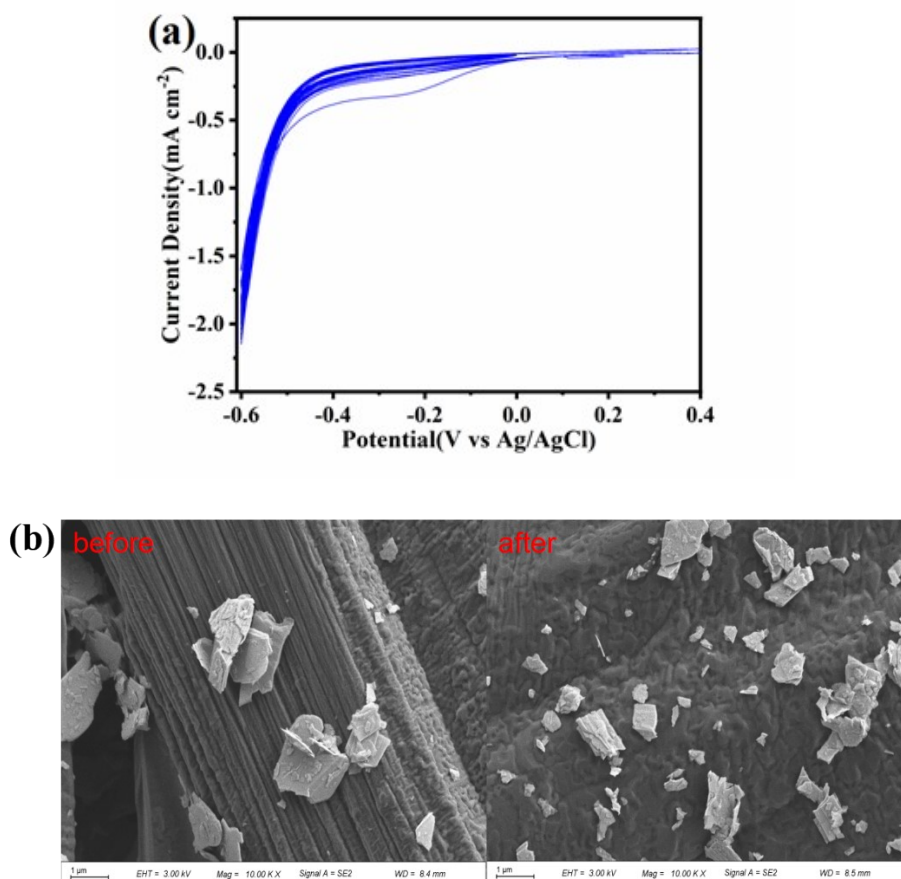

**Figure S6.** (a) Cyclic voltammogram of e-MoS<sub>2</sub> (100 cycles). (b) The SEM images of e-MoS<sub>2</sub> before and after 100 cycles of cyclic voltammetry.

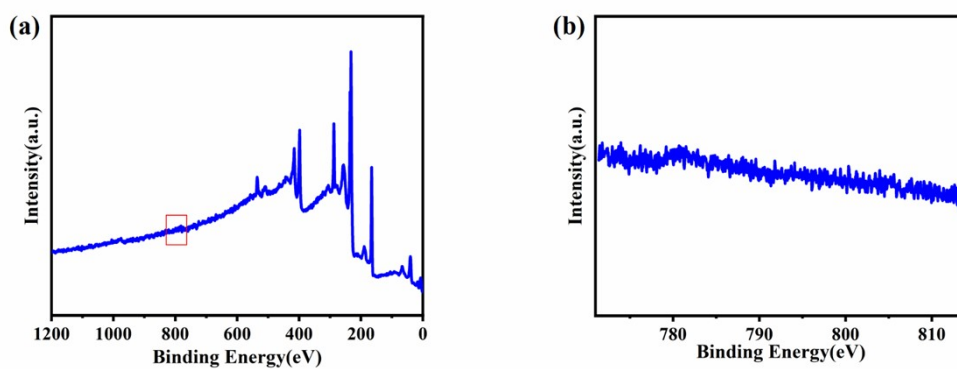

**Figure S7.** (a) XPS spectrum of Co assisted exfoliated MoS<sub>2</sub> nanosheets (survey scan) and (b) the XPS of Co 2p of Co assisted exfoliated MoS<sub>2</sub> nanosheets.

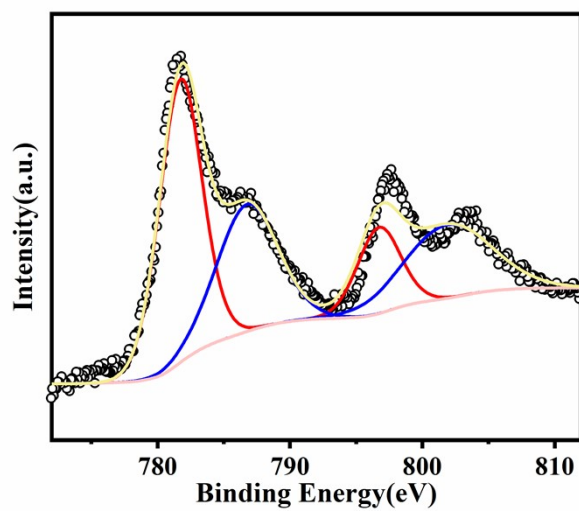

**Figure S8.** The XPS of Co 2p of intermediate  $\text{Co}_x\text{MoS}_2$ .

## Reference

1. K. J. Koski, C. D. Wessells, B. W. Reed, J. J. Cha, D. Kong and Y. Cui, *J. Am. Chem. Soc.*, 2012, **134**, 13773-13779.
